# Supplementary material for: Host-driven temperature dependence of Deformed wing virus infection in honey bee pupae
Source: PubMed Central journal article supplement (PMC10042853; doi:10.1038/s42003-023-04704-6), 2023-03-27
Supplement: 42003_2023_4704_MOESM2_ESM.pdf [file 42003_2023_4704_MOESM2_ESM.pdf]

1           Host-driven temperature dependence of  
2           Deformed wing virus infection in honey bee  
3           pupae (Supporting information)

4

5

6           Evan C Palmer-Young <sup>1\*</sup>, Eugene V Ryabov <sup>1,2</sup>, Lindsey Markowitz<sup>1,3</sup>, Dawn L Boncristiani <sup>1</sup>, Kyle  
7           Grubbs <sup>1</sup>, Asha Pawar <sup>1</sup>, Raymond Peterson <sup>1</sup>, Jay D Evans <sup>1</sup>

8

9           <sup>1</sup> USDA-ARS Bee Research Laboratory, Beltsville, MD, USA

10          <sup>2</sup> Department of Entomology, University of Maryland, College Park, MD, USA

11          <sup>3</sup> Department of Biology, University of Maryland, College Park, MD, USA

12          \*Corresponding author: [ecp52@cornell.edu](mailto:ecp52@cornell.edu), [evan.palmer-young@usda.gov](mailto:evan.palmer-young@usda.gov)

## 13 **SUPPORTING INFORMATION**

14 **Supplementary Note 1.** Amino acid sequences for DWV protease and fluorogenic substrate and  
15 composition of protease reaction buffer.

### 16 **Sequence for DWV 3C Protease**

17 GSTQQVDAAVNKILQNMVYIGVVFPKVPKSKWRDINFRCMLLHNRQCLMLRHYIESTAAFPEGTKYYFKYIHNQETR  
18 MSGDISGIEIDLLNLPRLYYGGLAGEESFDSNIVLVTMPNRIPECKSIKFIASHNEHIRAQNDGVLVTGDHTQLLAFENNN  
19 KTPISINADGLYEVLQGVYTPYHGDGVCGSILLSRNLQRPIIGIHVAGTEGLHGFGVAEPLVHEMFTGKA

### 20 **Sequence for FRET Peptide**

21 (DABCYL)-VQAKPEMDNPNG-(Glu(EDANS))

### 22 **Protease Reaction Buffer**

|    |                |        |
|----|----------------|--------|
| 23 | Tris, pH 7.0   | 50 mM  |
| 24 | NaCl           | 150 mM |
| 25 | EDTA           | 1 mM   |
| 26 | Dithiothreitol | 1 mM   |
| 27 | Glycerol       | 10%    |

28

29
