# Supplementary material for: Host-driven temperature dependence of Deformed wing virus infection in honey bee pupae
Source: PubMed Central journal article supplement (PMC10042853; doi:10.1038/s42003-023-04704-6), 2023-03-27
Supplement: 42003_2023_4704_MOESM3_ESM.pdf [file 42003_2023_4704_MOESM3_ESM.pdf]

## **Description of Additional Supplementary Files**

File Name: Supplementary Data 1

Description: Zipped folder with data spreadsheets for protease activity, bee traits, and pupal infection.
